# Supplementary material for: Exploring factors influencing the decision-making regarding cervical cancer screening participation and HPV vaccination uptake among Syrian-Dutch women: a qualitative interview study
Source: Research Square preprint supplement (doi:10.21203/rs.3.rs-7934683/v1), 2025-11-20
Supplement: Supplementary file 1 [file 7327d17802cdc9c055d2cdf0.docx]

# The vacciantion status of the participant's children

The vaccination status of the participants’ children is presented in Table 2. In this table, we first presented the number of participants who had children, then we indicated which women had children aged 9-26 years who were invited for the HPV vaccination. In total, the women included in the study had 23 children (8 sons and 15 daughters), who were the subject of the HPV vaccination questions. Of these children, 4 have been fully vaccinated, 1 has been partially vaccinated, 12 have not been vaccinated, and 6 were not sure.

Table 2: Self-reported HPV vaccination the children of the included Syrian-Dutch women

| **Syrian-Dutch participants with children (*n* = 9)** | **Son** | **Daughter** | **Total amount of children** |
| --- | --- | --- | --- |
| Self-reported number of children; *n* (%) | 15 (47) | 17 (53) | 32(100) |
| Included children | 8 (35) | 15(65) | 23(100) |
| Vaccinated | 2 (25) | 2 (13) | 4 (17) |
| Partly vaccinated | 0 (0) | 1 (7) | 1(4) |
| Not vaccinated | 4 (50) | 8 (53) | 12 (52) |
| Not sure | 2 (25) | 4(27) | 6 (26) |
