# Supplementary material for: Exploring factors influencing the decision-making regarding cervical cancer screening participation and HPV vaccination uptake among Syrian-Dutch women: a qualitative interview study
Source: Research Square preprint supplement (doi:10.21203/rs.3.rs-7934683/v1), 2025-11-20
Supplement: Supplementary file 2 [file b72f9bc2a61368f12f043bf9.docx]

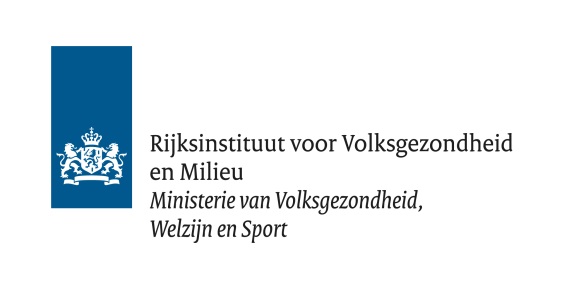

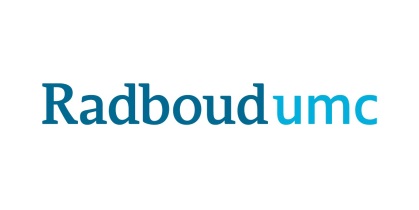

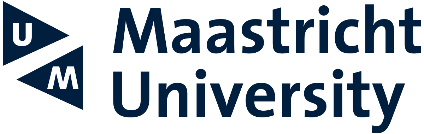


Interview guide Syrian-Dutch women

## Information needs for decision-making whether to participate or not in cervical cancer (CC) screening and whether to vaccinate their daughters or not against the Human Papillomavirus (HPV)

# **Introduction**

First, I would like to thank you for participating in this interview. My name is Nadien Al-Rubaie and I am a researcher at the National Institute of Public Health and Environment (RIVM). I will tell you something about the project and why we are conducting these interviews.

## Who is the RIVM?

The RIVM is conducting this research in collaboration with Radboudumc and Maastricht University. The RIVM is an organization that ensures that people stay healthy and investigates health problems.

## What is this research about?

At this moment, the RIVM is investigating the perceptions of Turkish-, Moroccan-, and Syrian-Dutch women regarding cervical cancer (CC) screening and the Human Papillomavirus (HPV) vaccination. On the long-term, this virus namely could cause CC. Previous research has shown that Turkish-, Moroccan-, and Syrian-Dutch women participate less in CC screening and have lower HPV vaccination uptake for their children. Therefore, we would like to investigate how we could improve the information, so that every women has sufficient knowledge to decide whether they want to participate or not. Therefore, todays’ interview is really important.

We want to know if and how you would seek for information regarding CC screening and the HPV vaccination at this moment. We would also like to know what kind of information you are mainly looking for and we will ask questions about your experiences with obtaining, processing and understanding this information.

## What does participating mean?

I will ask you questions to which you can respond. It is important to know that there is no good or fault; we are interested in your opinion. Everything that comes to mind is important and you can mention it. If you would rather not answer a question, then you can always indicate this. We would then skip this question and you do not have to give up any reason for that.

The interview will last approximately 1 hour. We want to record this interview, so that we can make good use of all the information. The recording will be typed out. Herein, we do not mention your name or other personal information. After transcription, the audio-file will be directly removed. We will treat everything you say confidentially.

> *Ask if the participant has filled in the online questionnaire. If not, then do this now together. Read through the informed consent form carefully.*

Then we could now start the interview officially. Do you have any questions?

> *Answer eventual questions.*

Then I will start the recording now.

> *Start recording.*

# **Opening questions**

## Acquaintance

**You can skip this if you went through the questionnaire together with the participant.*

- Could you shortly introduce yourself? Could you tell me your age and if you have any children?
  - If yes, how many?

Thank you for introducing yourself. I will now ask some general questions about your knowledge regarding CC.

## General knowledge about CC

- Did you hear about CC before?
  - If yes, what do you know about it?
- Did you have personal experiences with CC?
  - Do you know someone in your environment who has or has had CC?

In the Netherlands there are running two health programs aiming to reduce the incidence of CC. In the first place there is the CC screening, which aims for early detection of the disease. Second, there is the HPV vaccination, which protects against the development of CC.

CC is caused by HPV. Most of the time, your body is able to ‘clean up’ this virus itself, but this does not always succeed. If not, HPV may cause the development of up to 6 different types of cancer. This concerns cancer in the cervix, mouth and throat, labia, anus, vagina, and penis. It can take 10 to 20 years for the disease to develop. As a result, it is usually discovered late, making treatment more difficult and demanding. Because of this slow development of the disease, you often also do not notice symptoms. The first symptoms you might notice are: a burning sensation, bleeding, pain, abnormalities, itching and irritations.

- If you hear all of this, what are your first thoughts/feelings that come to mind?

First, I will ask you some questions about CC screening and thereafter also about the HPV vaccination. At the end there will be some questions about both programs.

# **Part 1: The CC screening**

## 1.1 Perceptions on CC screening

- Have you ever heard about CC screening before this interview?
- What do you already know about CC screening?
  - Where did you receive this information?
  - What do you think of this information?

Women between 30 and 60 years could participate in CC screening for free. Every five years you will receive an invitation around your birthday. If you participate, your own GP or GP assistant will take a swab test from you. This means that she will go over the opening of your uterus with a very thin brush. The lab will then check whether HPV is present or not. If they do not find HPV on your swab, you do not have to participate in the screening until your next invitation in five years. If HPV is found in your swab, they will check on the same sample if they also could find abnormal cells. If those are present as well, you will be referred to the gynecologist for further examination. If not, then you have to re-do a control swab at your GP.

- If you hear this, what are the first thoughts/feelings that come to mind?
- What do you think of the existence of CC screening? Why do you think that?

It is also possible to take the swab test yourself at home with the self-testing toolkit. You could also ask for a female health practitioner to take the swab test from you.

- What do you think of these options? Why?
- What is your preference: going to the GP or do it yourself? Why?

## Decision-making participation

Now I would like to ask some questions on how you have decided whether to participate or not in CC screening.

- Have you ever participated in CC screening before? **only asking if this is not mentioned before during this interview.*
- Do you know why you have decided whether to participate or not in CC screening?
  - Was it a conscious choice to (not) participate? Why/why not?
  - How did you decide whether to participate (or not) in CC screening?
  - Are there any other things that have influenced your choice?
- According to you, are there any advantages of CC screening?
  - If yes, which ones?
  - If no, why not?
- According to you, are there any disadvantages of CC screening?
  - If yes, which ones?
  - If no, why not?
- How do people around you think about participating in CC screening?
- Did you discuss your choice with other people? Why/why not?
  - If yes, where, how and with whom did you talk about this?
  - How did these conversations eventually influenced your choice?
- How did your personal experience, where you talked about before, influenced you choice on whether to participate or not in CC screening? **only ask if participant have indicated to do have personal experiences with CC.*
- Do you think there are reasons based on your religion to participate (or not) in CC screening?
  - How did this influence your choice?

*If culture is mentioned, ask the following questions:*

- Are there any norms and values within your culture that influenced your choice on whether to participate or not in CC screening? If yes:
  - Which are these?
  - How did this influence your own decision on whether to participate or not in CC screening?
- If you will be invited next time for CC screening, would you participate? Why/why not?

## 1.3 Current information materials

Now I would like to discuss the available information on CC screening.

>*Show current information materials: letter, brochure, self-testing toolkit.*

The information materials for CC screening consists of an invitation letter and brochure that you will receive at home. In the information folder you find information that supports you in making a choice on whether to participate or not. It is also possible to request a self-testing toolkit, which you would receive at home.

- Did you saw these information materials before? If yes:
  - Was is easy to find for you?
  - Did you understand the information that you read?
- What do you think of the information materials?
- What do you think of this way of providing information?
- Are you familiar with the translations available online? If yes: what do you think of these translations?
- Did you watch the videos (in Turkish, Moroccan-Arab or Berbers) that were made about CC screening?
  - If yes, what did you think of the videos?
- What do you think about videos being made in general?
- Did you actively seek for information on CC screening? If yes:
  - Where did you seek?
  - What did you find?
  - What do you think about this information?
- Did you find it difficult to find information about CC screening? Why/why not?
  - Did you find the information easy to understand?
- What would you do if you have any questions about CC screening?
  - Did you make use of this before? Why/why not?

## 1.4 Information needs

The following questions are about what you miss in the current information materials.

- Do you feel that you have the right information to make a decision on whether to participate or not in CC screening? Why/why not?
- According to you, what is the most important information to receive about CC screening?
- Do you think the current information is complete enough? Why/why not?
  - If not, what is missing according to you? Why?
- Are there specific things that could help by making a decision in whether to participate or not in CC screening?
  - What are these things?
  - How could these things support you?
- From whom would you like to receive information about CC screening? Why?

# **Part 2: The HPV vaccination**

(Only if the participant has a daughter/daughters between 9-26 years old)

Thank you for your answers. Then I would like to go through these questions, but then regarding HPV vaccination for your child/children.

## 2.1 Perceptions on HPV vaccination

- Have you ever heard about HPV vaccination before this interview?
- What do you already know about HPV vaccination?
  - Where did you receive this information?
  - What do you think of this information?

The HPV vaccination prevents infection with most of the HPV variants that could cause cancer on several places for both boys and girls. The HPV vaccination protects the person that is vaccinated, but also transmission of the virus via sexual contact with the partner. The HPV vaccination prevents the virus from spreading through the population. Therefore, all boys and girls will be invited for the HPV vaccination in the year they become 10 years old. This is part of the National vaccination program (‘rijksvaccinatieprogramma’), just like the vaccins against measles or meningitis. The invitation for the HPV vaccination is sent by the Youth Healthcare (‘jeugdgezondheidszorg/JGZ) or a Center for Youth and Family. For long-time protection, two vaccinations are necessary (with at least a 6 months interval).

- If you hear this, what are the first thoughts/feelings that come to mind?
- What do you think about having your daughter vaccinated against HPV? Why?
- What do you think about boys also being vaccinated against HPV since 2022? Why?
- Why do you think that the government is offering HPV vaccination? What do you think about this?
- According to you, what is the influence of the HPV vaccination on the risk of CC? Why do you think that?

## Decision-making participation

Now I would like to ask some questions on how you have decided whether to vaccinate your child/children or not against HPV.

- Did you have vaccinated your daughter(s) against HPV?
  - Was this a conscious choice? Why/why not?
  - How did you decide this?
  - Where there any other things that influence your choice?
- Did you have vaccinated your sons(s) against HPV?
  - Was this a conscious choice? Why/why not?
  - How did you decide this?
  - Where there any other things that influence your choice?
- According to you, are there any advantages of vaccinating your child/children against HPV?
  - If yes, which ones?
  - If no, why not?
- According to you, are there any disadvantages of vaccinating your child/children against HPV?
  - If yes, which ones?
  - If no, why not?
- How do people around you think about vaccinating their child/children against HPV?
- Did you discuss your choice on whether to vaccinate your child/children or not with other people? Why/why not?
  - If yes, where, how and with whom did you talk about it?
  - How did these conversations ultimately influence your choice?
- How did your personal experience, where you talked about before, influenced you choice on whether to vaccinate your child/children or not against HPV? **only ask if participant have indicated to do have personal experiences with CC.*
- Do you think there are reasons based on your religion to vaccinate your child/children (or not) against HPV?
  - How did this influence your choice?

*If culture is mentioned, ask the following questions:*

- Are there any norms and values within your culture that influenced your choice on whether to vaccinate your child/children or not against HPV? If yes:
  - Which are these?
  - How did this influence your own decision on whether to vaccinate your child/children or not against HPV?
- Did you vaccinate your child/children with other vaccines? Why/why not?
  - How has this influenced your choice for the HPV vaccination?
  - What is the difference with the HPV vaccination for you?

## Current information materials

Then I would like to discuss the available information on the HPV vaccination.

>*Show current information materials: brochure*

The information materials for the HPV vaccination consists of an invitation letter and brochure that you will receive at home. In the information folder you find information that supports you in making a choice on whether to vaccinate your child/children or not.

- Did you saw these information materials before? If yes:
  - Was it easy to find for you?
  - Did you understand the information that you read?
- What do0 you think of the information materials?
- What do you think of this way of providing information?
- Did you actively seek for information about the HPV vaccination? If yes:
  - Where did you seek?
  - What did you find?
  - What do you think about this information?
- What would you do if you have any questions about the HPV vaccination?
  - Did you make use of this before? Why/why not?

## 2.4 Information needs

The following questions are about what you miss in the current information materials.

- Do you feel that you have the right information to make a decision on whether to vaccinate your child/children or not against HPV? Why/why not?
- According to you, what is the most important information to receive about the HPV vaccination?
- Do you think the current information is complete enough? Why/why not?
  - If not, what is missing according to you? Why?
- Are there specific things that could help by making a decision in whether to vaccinate your child/children or not against HPV?
  - What are these things?
  - How could these things support you?
- From whom would you like to receive information about the HPV vaccination? Why?

# **Part 3: Future information materials**

*Make sure that you have at least 15 minutes left for this part, most important!

Thank you for your answers. Now we arrived at the last part. I will ask some questions about the form in which you think the information can best be given.

## 3.1 Integrated information materials

At this moment, the information for CC screening and the HPV vaccination is given separately. This is done with the information materials we just discussed.

- Do you see agreements between CC screening and the HPV vaccination?
  - If yes, which one?
  - If no, why not?
- What do you think of the information now being provided separately? Why do you think that?
- What would you think of integrated information materials? Why do you think that?

## 3.2 Format/form of information

As I told you at the beginning of our conversation, the aim of this research is to develop new information materials for Turkish-, Moroccan-, and Syrian-Dutch women. Therefore, now I would like to ask you questions in which forms you would like to receive the information.

>*If the participant indicated to prefer the information materials being provided separately, then go through the questions below for each program separately as well.*

- How do you prefer to receive the information? For example:

**Note: one does not exclude the other, so for each question propose a combination of both and continue asking questions.*

- - In a letter (textual) or video (audio/visual)? Why?
  - Digital or on paper? Why?
    - If digital: what do you mean with digital? (*if necessary, give options: social media, TV, mail, radio)*
    - If paper: what do you mean with on paper? (if necessary, give options: postal, at the GP, community centers, etc.)
  - Would you prefer to read/listen/watch the information yourself or that you could ask questions/have a conversation about it? Why?
  - Would you prefer to look up the information yourself at a time of your choosing or to be offered it at a fixed time? Why?
- From whom would you like to receive the information? *If necessary give options: your own GP, Municipal Health Service (GGD), the National Institute of Public Health and Environment (RIVM), community centers, schools.*
- In which language would you like to receive the information?
  - Who should we work with to make the translations the best it can be?
- Are there sensitive/specific issues that need to be taken into account in the layout, images, or text used in the information materials?
  - Whom should we work with to make this the best it can be?
- Do you have any other suggestions to improve the information materials for CC screening and/or the HPV vaccination for Turkish-, Moroccan-, and/or Syrian-Dutch women?
- Is there anything else you would like to share about the topic that was not covered?

These were the questions for the interview. I will now stop the recording.

>*Stop recording.*

# **Closing**

- Do you have further questions about the topic of the interview?
- What did you think of the interview?
- Are there other people in your environment (within our target population) who might be interested in being interviewed about this topic?
  - If yes,: then you could share our email addresses and/or telephone number with them so that they could contact us.
  - Would you mind if we contact you again soon? You could then ask any question you might come up with after the interview.
    - We will also ask you to share with us any contact details (email address/telephone number) of people you have spoken to who are interested in participating in this interview.

Then I think we’ve discussed everything. I would like to thank you very much for participating. Your participation has been very useful for our research. As a thank you, you will receive a voucher worth €18,- from us. If you have any questions or comments afterwards, you can contact us via the email address/telephone number stated in the information letter.
